# Supplementary material for: Size structure–catalytic performance correlation of supported Ni/MCF-17 catalysts for COx-free hydrogen production
Source: Royal Society of Chemistry journal article supplement (doi:10.1039/c8cc01884g), 2018-01-01
Supplement: c8cc01884g1.pdf [file c8cc01884g1.pdf]

## Supporting Information

### Size Structure - Catalytic Performance Correlation of Supported Ni/MCF-17 Catalysts for CO<sub>x</sub>-free Hydrogen Production

Yanping Li, <sup>a</sup> Jie Wen, <sup>a</sup> Arshid M. Ali, <sup>b</sup> Ming Duan, <sup>a</sup> Wei Zhu, <sup>c</sup> Hui Zhang, <sup>\*a</sup> Chen Chen <sup>c</sup> and Yadong Li <sup>c</sup>

<sup>a</sup> The Center of New Energy Materials and Technology, College of Chemistry and Chemical Engineering, Southwest Petroleum University, Chengdu 610500, China

<sup>b</sup> Department of Chemical & Materials Engineering, King Abdulaziz University, Jeddah 72523, Kingdom of Saudi Arabia

<sup>c</sup> Department of Chemistry, Tsinghua University, Beijing 100084, China

E-mail: [huizhang@swpu.edu.cn](mailto:huizhang@swpu.edu.cn)

### Table of Contents

1. Experimental section Page S2
2. TEM images of supported Ni/MCF-17 catalysts Page S5
3. BET patterns of supported Ni/MCF-17 catalysts Page S5
4. XRD analysis of the reduced Ni/MCF-17 catalysts Page S6
5. XPS analysis of the Ni<sub>2p</sub> in Ni/MCF-17 catalysts Page S7
6. TEM images of reduced Ni/MCF-17 catalysts Page S9
7. NH<sub>3</sub> decomposition stability test of NiR110/MCF-17catalyst Page S9
8. HAADF-STEM and EDX mapping of NiR110/MCF-17 catalyst Page S10
9. Establishment of basic cubo-octahedron structure model and relationship between the concentration of B<sub>5</sub> sites and average Ni particles size Page S10
10. References Page S12

## 1. Experimental Section

### Synthesis of Ni-based catalysts

*Synthesis of Ni nanoparticles.* All reagents used in this work are of analytical grade. 0.12 g Ni(acac)<sub>2</sub>, 0.16 mL oleic acid (OA) and 7.5 mL oleylamine (OAm) were mixed in a three-neck flask. Dissolution of Ni(acac)<sub>2</sub> at 60 °C was carried out under Argon flow and continuous magnetic stirring. Later, the temperature was raised to 110 °C and was kept for 1 h to remove dissolved oxygen and impurities, such as water. Soon after, 1 mL of OAm solution with 0.13 g Borane tert-butylamine complex (TBAB) was quickly injected into the above solution. A rapid color change from light green to black indicated nickel species reduction and the reaction was allowed to continue at 110 °C for 15 min. After centrifugation with ethanol, the final nickel nanoparticle were stored in 10 mL of hexane for further use. All above steps were repeated to reduce nickel species under different temperatures of 90 °C, 150 °C and 180 °C. Ni nanoparticles obtained under different reduction temperatures of 90 °C, 110 °C, 150 °C and 180 °C were denoted as NiR90, NiR110, NiR150 and NiR180.

In addition, following nickel nanoparticle were also prepared under similar method with slight modification:

- i. 0.06NiR180: 0.06 g of Ni(acac)<sub>2</sub> instead of 0.12 g.
- ii. NiR90 and NiR110: simultaneous addition of Ni(acac)<sub>2</sub> and TBAB to the flask at room temperature instead of elevated temperature to study the effect of reduction temperature on nickel particle size.
- iii. Ni180: Same method but without TBAB.

*Synthesis of support MCF-17.* A solution, obtained after adding 4 g of triblock copolymer Pluronic P123 (BASF) dissolved in an acidic solution (10 mL of 37 wt% HCl and 65 mL of H<sub>2</sub>O) to 4g of 1,3,5-trimethylbenzene (TMB), was heated to 37-40 °C under vigorous stirring for 2 h. Later, 9.2 mL of tetraethoxysilane (TEOS) was added and stirred for 5 min. The solution mixture was aged in autoclave at 40 °C for 20 h under a quiescent condition. Further, 46 mg of NH<sub>4</sub>F was added to the mixture and again aged at 100 °C for another 24 h. The resulting precipitate was filtered and

multiple rinsed with water and ethanol, then dried. The obtained white powder MCF-17 was calcined in air at 900 °C for 6 h. In addition, both pore and window sizes of spherical MCF-17 was adjusted by varying TMB and NH<sub>4</sub>F quantities, as well as the synthesis temperature.

*Synthesis of supported Ni-based catalysts.* Precise amounts of Ni nanoparticles dispersion was added to the solution that obtained by adding 0.98 g of spherical MCF-17 in. After 10 h of ultrasonic stirring, suspension was filtered, multiple rinse with hexane and dried in ceramic dish. Later, it was placed in a tube furnace with flow of Argon, and was heated to 400 °C with 2 °C/min temperature ramp for 5 h before it was cooled down to room temperature. The Ni nanoparticles supported on MCF-17 were collected and stored. All the catalysts were named as NiR90/MCF-17, NiR110/MCF-17, NiR150/MCF-17, NiR180/MCF-17, 0.06NiR180/MCF-17, NiCR90/MCF-17, NiCR110/MCF-17 and Ni180/MCF-17.

### **Characterizations**

The X-ray diffraction (XRD) patterns of the samples were measured on an X'Pert PRO MPD diffractometer using a X'Celerator detector and Cu K $\alpha$  radiation ( $\lambda = 1.5406 \text{ \AA}$ ) operating at 40 kV and 40 mA from 10° to 80° with a  $2\theta$  step size of 0.02°. Transmission electron microscope (TEM) images were measured on a FEI Tecnai G2 F20 field emission transmission electron microscope with accelerating voltage of 200 kV. One drop of the suspension sample was added to a carbon-coated copper mesh for transmission electron microscope analysis. The specific surface areas, pore volumes, average pore sizes and pore size distributions of the catalysts were measured by N<sub>2</sub> adsorption-desorption on a Quadrasorb SI analyzer (Quantachrome, USA) at 77 K after degassing the samples for 3 h at 573 K. The surface areas, pore sizes and pore volumes obtained from N<sub>2</sub> adsorption-desorption measurement. Specifically, pore size  $D_{\text{BJH}}$  obtained from the maximal of the pore size distribution curve calculated by the BJH method, the pore volumes calculated from the desorption branch of N<sub>2</sub> physisorption isotherm. The X-ray photoelectron spectra (XPS) patterns were measured on a Thermo ESCALAB 250XI instrument using a monochromatic Al-K $\alpha$  X-ray source under the conditions of 1486.6 eV. H<sub>2</sub> chemisorption were performed at

40 °C by using ChemBET Pulsar Automatic Chemisorption Analyzer (Quantachrome Instrument). A 200 mg catalyst sample was reduced at 400 °C with H<sub>2</sub> for 1 h. Then, the H<sub>2</sub> flow was replaced with Ar flow for 1 h to remove the residual H<sub>2</sub> and the temperature was decreased to 40 °C. Finally, Ni particle sizes and Ni dispersion were measured. A spherical model for the metal nanoparticles and H/Ni adsorption stoichiometry 1 is assumed in calculating the metal dispersion.

### Catalytic measurements

The NH<sub>3</sub> decomposition reactions were performed in a fixed-bed quartz microreactor (about 4 mm i.d.) under atmospheric pressure, 6000 mL·g<sub>cat</sub><sup>-1</sup>·h<sup>-1</sup> gas hourly space velocity (GHSV) and reaction temperature at 573–873 K. Prior to catalytic conversion of NH<sub>3</sub> measurement, the catalysts were reduced in a 5% H<sub>2</sub>/Ar gas mixture (flow rate of 30 mL/min) at 673 K for 1 h with a ramping rate of 10 K/min. After the reduction, a 10 mL/min of pure NH<sub>3</sub> (99.999%) was used for measured. The expected reaction temperature (for instance to 623 K) was achieved by using a ramping rate of 5 K/min. In all experiments, the catalytic NH<sub>3</sub> decomposition performance was investigated under steady temperature state. Both, the reactant and products were analyzed by using GC instrument (SC-200, China) provided with a Poropak Q column and thermal conductivity detector with Ar as carrier gas.

The conversion of NH<sub>3</sub> ( $X_{NH_3}$ ) was calculated by using the following equation:

$$X_{NH_3} = \frac{(A_{NH_3,in} - A_{NH_3,out})}{A_{NH_3,in}} \times 100\%$$

Where  $A_{NH_3,in}$  = Amount of ammonia in feed;

$A_{NH_3,out}$  = Unconverted amount of ammonia.

## 2. TEM images of supported Ni/MCF-17 catalysts

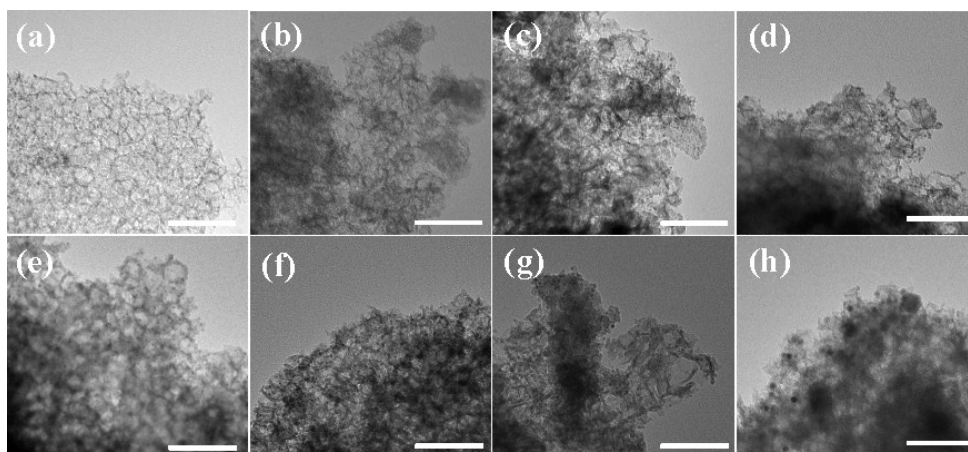

**Fig. S1.** TEM images of Ni/MCF-17 catalysts composed of different particle size nanocrystals of (a) 0.06NiR180/MCF-17, (b) NiR180/MCF-17, (c) NiR150/MCF-17, (d) NiR110/MCF-17, (e) NiR90/MCF-17, (f) NiCR90/MCF-17, (g) NiCR110/MCF-17 and (h) Ni180/MCF-17. The scale bar is 100 nm.

## 3. BET patterns of supported Ni/MCF-17 catalysts

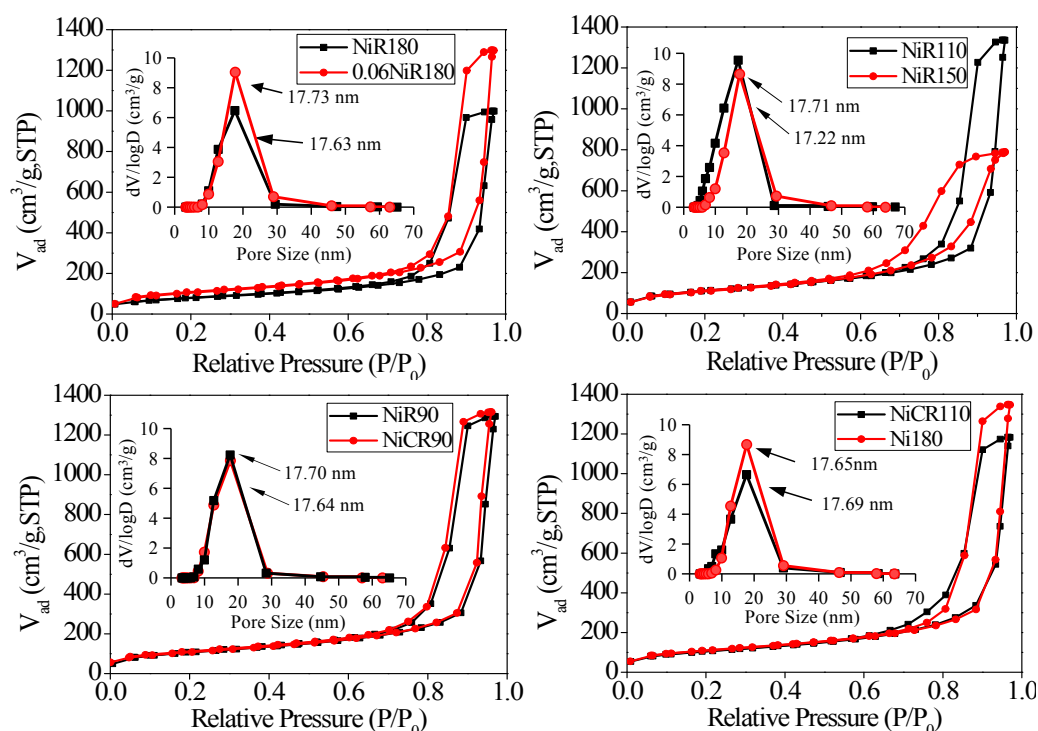

**Fig. S2.** The  $N_2$  adsorption-desorption isotherms and corresponding BJH mesopore size distribution curves measured at 77 K after degassing the samples for 3 h at 573 K.

**Table S1** Comparison of Ni loadings, textural properties, particle sizes and catalytic performances of Ni/MCF-17 catalysts (catalytic performance measured at 575 °C, pure NH<sub>3</sub>, GHSV = 6000 mLg<sub>cat</sub><sup>-1</sup>h<sup>-1</sup> and 0.1 MPa)

| Catalysts  | Ni loadings <sup>a</sup><br>(wt %) | Surfac e areas<br>(m <sup>2</sup> g <sup>-1</sup> ) | Pore sizes<br>(nm) | Pore volumes<br>(cm <sup>3</sup> g <sup>-1</sup> ) | Ni dispersion<br>(%) | Ni particle size (nm) |        |                                 | Activity<br>(CTY) <sup>b</sup> | HTOF <sup>c</sup> |
|------------|------------------------------------|-----------------------------------------------------|--------------------|----------------------------------------------------|----------------------|-----------------------|--------|---------------------------------|--------------------------------|-------------------|
|            |                                    |                                                     |                    |                                                    |                      | By TEM                | By XPS | By H <sub>2</sub> chemisorption |                                |                   |
| MCF-17     | –                                  | 573.16                                              | 17.05              | 2.32                                               | –                    | –                     | –      | –                               | –                              | –                 |
| 0.06NiR180 | 0.90                               | 509.37                                              | 17.73              | 2.11                                               | 41.94                | 1.5                   | 16.0   | 1.36                            | 1.91                           | 28.3              |
| NiR180     | 0.73                               | 532.21                                              | 17.63              | 1.66                                               | 34.22                | 1.8                   | 18.9   | 2.46                            | 2.20                           | 25.0              |
| NiR150     | 0.40                               | 526.11                                              | 17.22              | 1.98                                               | 10.85                | 2.5                   | 23.2   | 7.78                            | 2.71                           | 50.5              |
| NiR110     | 0.56                               | 561.20                                              | 17.71              | 2.13                                               | 49.74                | 3.0                   | 15.3   | 2.04                            | 2.75                           | 56.1              |
| NiR90      | 0.74                               | 546.33                                              | 17.70              | 2.18                                               | 57.60                | 3.4                   | 18.2   | 1.76                            | 2.54                           | 22.2              |
| NiCR90     | 0.64                               | 570.12                                              | 17.64              | 2.17                                               | 61.86                | 4.0                   | 15.7   | 1.64                            | 2.70                           | 33.7              |
| NiCR110    | 0.67                               | 542.97                                              | 17.65              | 1.93                                               | 18.82                | 4.5                   | 17.1   | 4.48                            | 2.62                           | 29.4              |
| Ni180      | 0.72                               | 557.76                                              | 17.69              | 2.21                                               | 41.75                | 8.0                   | 19.8   | 11.75                           | 1.22                           | 12.5              |

<sup>a</sup>The values obtained from ICP. <sup>b</sup>CTY: 10<sup>-3</sup> mol<sub>NH<sub>3</sub></sub>·g<sub>Ni</sub><sup>-1</sup>·s<sup>-1</sup>.

<sup>c</sup>HTOF: 10<sup>-3</sup> s<sup>-1</sup> based on Ni dispersion from H<sub>2</sub> chemisorption.

#### 4. XRD analysis of the reduced Ni/MCF-17 catalysts

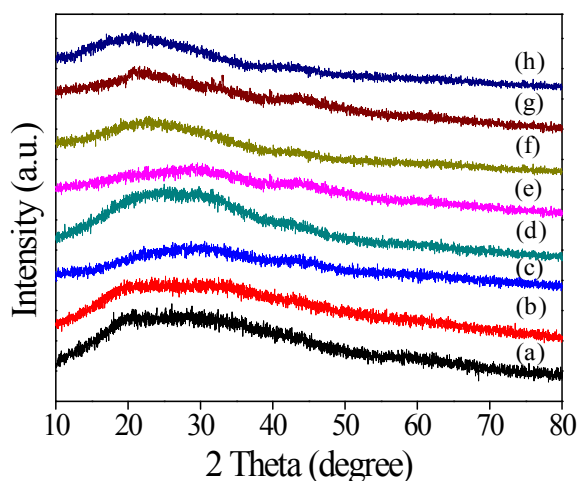

**Fig. S3.** XRD patterns of the reduced Ni/MCF-17 catalysts of (a) 0.06NiR180, (b) NiR180, (c) NiR150, (d) NiR110, (e) NiR90, (f) NiCR90, (g) NiCR110 and (h) Ni180. The catalysts were reduced in a 5% H<sub>2</sub>/Ar mixture gas flow at 673 K for 3 h.

To identify the possible impact of Ni precursor quantities and reduction temperature on the phase composition, all the as-prepared catalyst were characterized by using XRD studies and results are shown in Fig. S3. Almost, all the XRD patterns are

identical and exhibited uniform crystalline structure, with only one obvious characteristic peak in the range of 21° to 25°, attributed as the Ni (1 0 1) plane. An indication that the reduced Ni-base catalysts are still relatively composed of pure Ni phase. In addition, an increase in the peak intensity is consistent with a higher Ni loading. The samples who possess narrower full width at half maximum (FWHM) of the diffraction peaks,<sup>1</sup> indicated larger particles and it agrees to the TEM observations.

### 5. XPS analysis of the Ni<sub>2p</sub> in Ni/MCF-17 catalysts

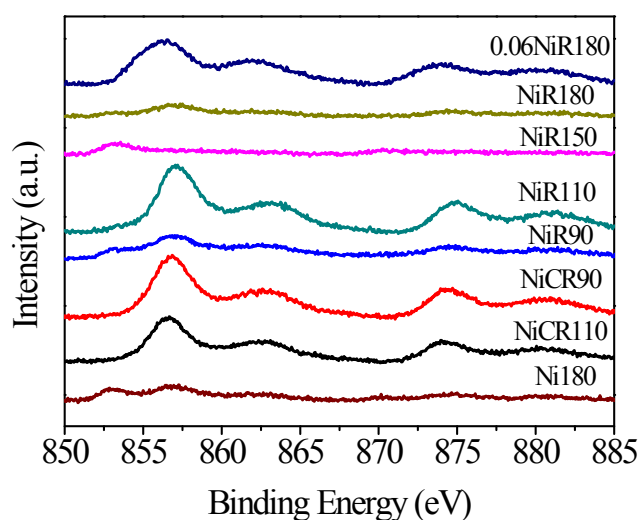

**Fig. S4.** XPS patterns of the Ni<sub>2p</sub> in Ni/MCF-17 catalysts.

To probe the surface properties of Ni/MCF-17 catalysts, the Ni<sub>2p</sub> XPS patterns were used and the obtained results are shown in Fig. S4. Based on the published data,<sup>2, 3</sup> the major nickel phase could be inferred from the following binding energies:

- i. NiO intimately interacting with support is around 856.0 eV and
- ii. Bulk NiO is around 854.0 eV.

The detected Ni<sub>2p3/2</sub> levels are shifted from 853.29 eV (in NiR150/MCF-17) to 857.16 eV (in NiR110/MCF-17). The binding energies of the Ni-based catalysts show one major peak around 856.0 eV except for NiR150/MCF-17. A vivid indication that Ni exists in NiO form in all the Ni-based catalysts and NiO intimately interacts with support. In addition, the NiO peaks at the binding energy of 853.29 eV (in case of NiR150/MCF-17) are attributed to the formation of bulk NiO species.

**Table S2** Summary of major Ni phase, Ni<sub>2p</sub> binding energy and atomic ratio of Ni-based catalysts determined by XPS analysis.

| Catalysts  | Major Ni phase | Ni <sub>2p</sub> binding energy, eV | Atomic ratio $n_{\text{Ni}}/n_{\text{Si}} (*10^{-3})$ | Atomic ratio $n_{\text{Ni}}/n (*10^{-3})$ |
|------------|----------------|-------------------------------------|-------------------------------------------------------|-------------------------------------------|
| 0.06NiR180 | NiO            | 856.33                              | 10.33                                                 | 0.09                                      |
| NiR180     | NiO            | 857                                 | 3.97                                                  | 0.20                                      |
| NiR150     | NiO            | 853.29                              | 1.94                                                  | 0.34                                      |
| NiR110     | NiO            | 857.16                              | 13.20                                                 | 0.07                                      |
| NiR90      | NiO            | 857.01                              | 5.31                                                  | 0.19                                      |
| NiCR90     | NiO            | 856.83                              | 11.42                                                 | 0.09                                      |
| NiCR110    | NiO            | 856.62                              | 7.68                                                  | 0.12                                      |
| Ni180      | NiO            | 856.86                              | 2.69                                                  | 0.27                                      |

Summary of the major Ni phase, Ni<sub>2p</sub> binding energy and relative atomic ratio of Ni:Si and relative content of Ni in Ni/MCF-17 catalysts determined by XPS analysis is shown in Table S2. The highest atomic ratio of  $n_{\text{Ni}}:n_{\text{Si}} \approx 13.20 \times 10^{-3}$  in NiR110/MCF-17 which is approximately 7 times higher than of lowest atomic ratio of Ni:Si in NiR150/MCF-17 ( $\approx 1.94 \times 10^{-3}$ ). Whereas the atomic ration  $n_{\text{Ni}}/n = 11.66 \times 10^{-3}$  and  $1.90 \times 10^{-3}$  for NiR110/MCF-17 and NiR150/MCF-17 catalyst, respectively. According to previous publication,<sup>4</sup> the sizes of Ni particles obtained from the intensity of XPS signal by using Kerkhof-Moulijn method measured at different relative atomic concentrations  $(n_{\text{Ni}}/n_{\text{Si}})_{\text{exp}}$ . Lower relative intensity of Ni<sub>2p</sub> XPS experimental signal  $(n_{\text{Ni}}/n_{\text{Si}})_{\text{exp}}$  indicates large Ni particles. This could be because of considerable number of Ni atoms located in the bulk of Ni particles where they may not be detectable by XPS. As the catalyst NiR150/MCF-17 yielded the lowest  $(n_{\text{Ni}}/n_{\text{Si}})_{\text{exp}}$ , an indication of largest Ni particle size in the nickel-based catalysts. In fact, the order of particles size by XPS studies are NiR110/MCF-17 < NiCR90/MCF-17 < 0.06NiR180/MCF-17  $\approx$  NiCR110/MCF-17 NiR90/MCF-17 < NiR180/MCF-17  $\approx$  Ni180/MCF-17 < NiR150/MCF-17.



## 6. TEM images of reduced Ni/MCF-17 catalysts

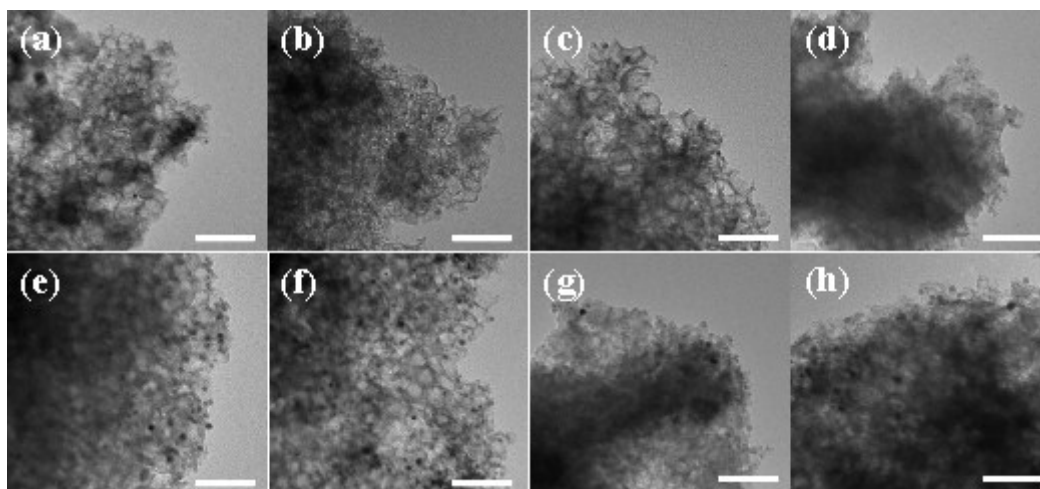

**Fig. S5.** The TEM images of reduced Ni/MCF-17 catalysts of (a) 0.06NiR180/MCF-17, (b) NiR180/MCF-17, (c) NiR150/MCF-17, (d) NiR110/MCF-17, (e) NiR90/MCF-17, (f) NiCR90/MCF-17, (g) NiCR110/MCF-17 and (h) Ni180/MCF-17. The catalysts were reduced in a 5% H<sub>2</sub>/Ar mixture gas flow at 673 K for 3 h. The scale bar is 100 nm.

## 7. NH<sub>3</sub> decomposition stability test of NiR110/MCF-17 catalyst

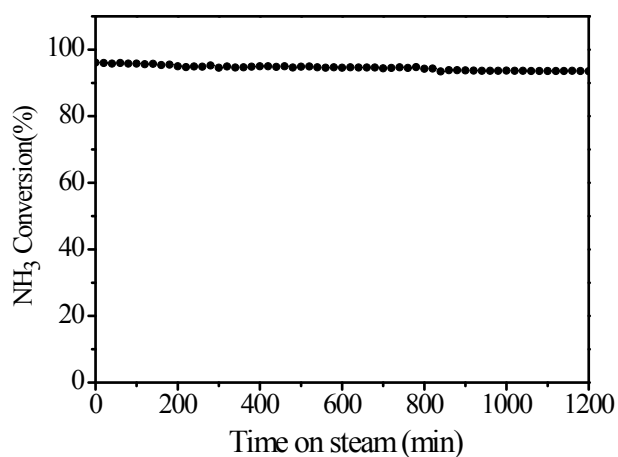

**Fig. S6.** NH<sub>3</sub> decomposition stability test of NiR110/MCF-17 catalyst (Reaction conditions: Pure NH<sub>3</sub>, GHSV = 6000 mL·g<sub>cat</sub><sup>-1</sup>·h<sup>-1</sup>, 0.1 MPa and 20 h).

## 8. HAADF-STEM and EDX mapping of NiR110/MCF-17 catalyst

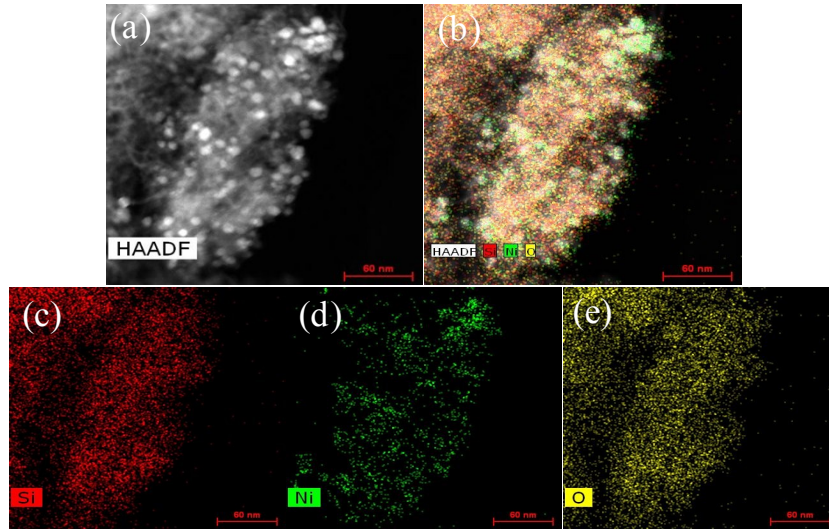

**Fig. S7.** (a) HAADF-STEM image of NiR110/MCF-17 catalyst and EDX mapping spectra of (b) all element, (c) Si, (d) Ni and (e) O . The scale bar is 60 nm.

## 9. Establishment of basic cubo-octahedron structure model and relationship between the concentration of $B_5$ sites and average Ni particles size

According to results published by Hardeveld *et al.*<sup>5</sup>, a basic cubo-octahedron structure model was established and a better approximation to a spherical shape can be obtained. This model assumes that cubo-octahedron is symmetrical and the cube planes and the octahedron planes have the same size. If there are  $n$  atoms arranged along the edge of the cube plane and  $m$  atoms located along the intersection line of octahedron planes, the octahedron plane was composed of alternating non-regular hexagons with  $m$  and  $n$  atoms along the edges, and the cube planes are square. Therefore, the concentration of  $B_5$  sites can be calculated according to eqs. (S1) ~ (S4), among, the basic atoms of number  $N_{\text{basic}}$  of cubo-octahedron is

$$N_{\text{basic}} = \frac{1}{3}(m + 2n - 2)\{2(m + 2n - 2)^2 + 1\} - n(n - 1)(2n - 1) \quad (\text{S1})$$

Additional atoms were placed as incomplete layers, the maximum  $B_5$  sites number

$n(\text{B}_5)_{\text{max}}$  is

$$n(\text{B}_5)_{\text{max}} = 8\{3[(m-3) + (n-2)]\} + 6[4(n-3)] = 24(m+2n-8) \quad (\text{S2})$$

The atoms number of added in incomplete layer  $N_{\text{ad}}$  (with condition  $m > 3$  and  $n > 2$ ) is

$$N_{\text{ad}} = 8\left\{\frac{1}{2}[(m-2) + 2(n-2)][(m-2) + 2(n-2) + 1] - 3\left[\frac{1}{2}(n-2)(n-1)\right]\right\} + 6(n-3)^2 \quad (\text{S3})$$

The total atoms number of which make up cubo-octahedron structure model  $N_{\text{total}}$  is

$$N_{\text{total}} = N_{\text{basic}} + N_{\text{ad}} \quad (\text{S4})$$

According to the above formula, take  $m = n$ , a series of numbers were calculated for this model are shown in Table S3.

**Table S3** The a series of numbers  $N_{\text{basic}}$ ,  $N_{\text{ad}}$ ,  $N_{\text{total}}$  and  $n(\text{B}_5)_{\text{max}}$  of basic cubo-octahedron structure model.

| m  | $N_{\text{basic}}$ | $N_{\text{ad}}$ | $N_{\text{total}}$ | $n(\text{B}_5)_{\text{max}}$ | B <sub>5</sub> sites concentration <sup>a</sup> | $d_{(\text{Ni})}$ , Å |
|----|--------------------|-----------------|--------------------|------------------------------|-------------------------------------------------|-----------------------|
| 3  | 201                | 24              | 225                | 24                           | 0.107                                           | 16.8                  |
| 4  | 586                | 102             | 688                | 96                           | 0.140                                           | 24.4                  |
| 5  | 1289               | 240             | 1529               | 168                          | 0.110                                           | 31.8                  |
| 6  | 2406               | 438             | 2844               | 240                          | 0.084                                           | 39.1                  |
| 7  | 4033               | 696             | 4729               | 312                          | 0.066                                           | 46.5                  |
| 8  | 6226               | 1014            | 7240               | 384                          | 0.053                                           | 53.8                  |
| 9  | 9201               | 1392            | 10593              | 456                          | 0.043                                           | 61.0                  |
| 10 | 12934              | 1830            | 14764              | 528                          | 0.036                                           | 68.1                  |

Here,  $d_{(\text{Ni})} = \sqrt[3]{\frac{6(\sqrt{2}d_{\text{at}})^3}{4\pi}} N_{\text{total}} = 1.11\sqrt[3]{N_{\text{total}}} d_{\text{at}}$ ;  $d_{\text{at}}(\text{Ni}) = 2.49 \text{ \AA}$ ;

$$\text{B}_5 \text{ sites concentration} = \frac{n(\text{B}_5)_{\text{max}}}{N_{\text{total}}}$$

According to the data of Column 6 and Column 7 in Table S3, the relationship curve

between the concentration of B<sub>5</sub> sites and average Ni particles size can be plotted.

## 10. References

1. C. Zhang, S. Hwang and Z. Peng, *J. Mater. Chem. A*, 2014, **2**, 19778–19787.
2. Y. J. Huang, J. A. Schwarz, J. R. Diehl and J. P. Baltrus, *Appl. Catal.*, 1988, **36**, 163–175.
3. P. Legare and A. Fritsch, *Surf. Interface Anal.*, 2010, **15**, 698–700.
4. A. Y. Khodakov, A. Griboval-Constant, R. Bechara and V. L. Zholobenko, *J. Catal.*, 2002, **206**, 230–241.
5. R. V. Hardeveld and A. V. Montfoort, *Surf. Sci.*, 1966, **4**, 396-430.
